# Supplementary material
Source: PubMed Central journal article supplement (PMC2718740)

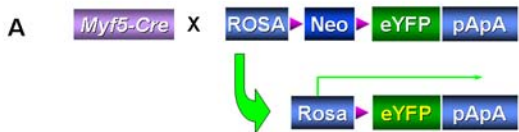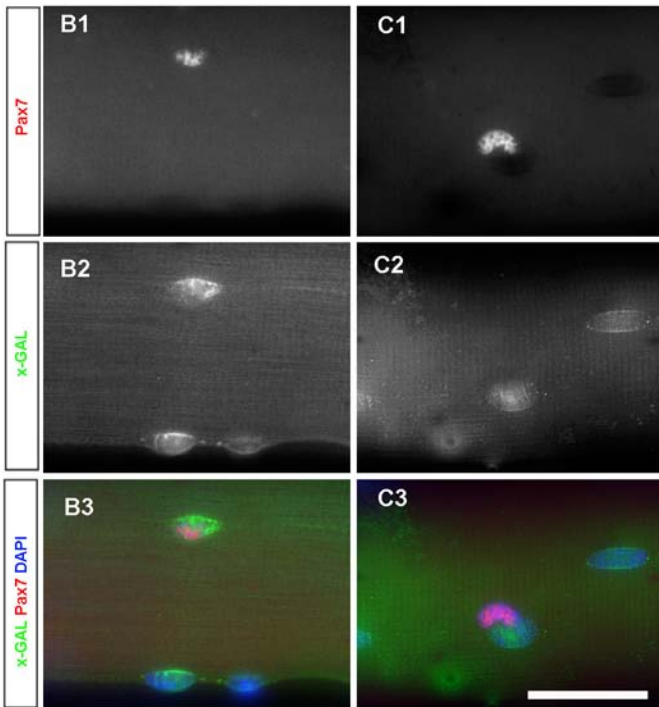

Figure S2

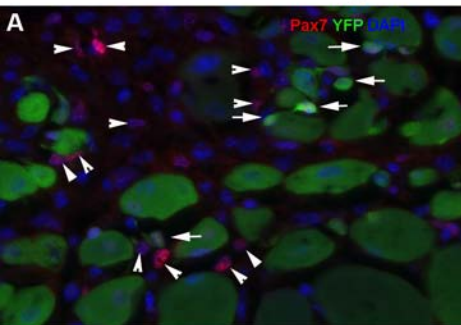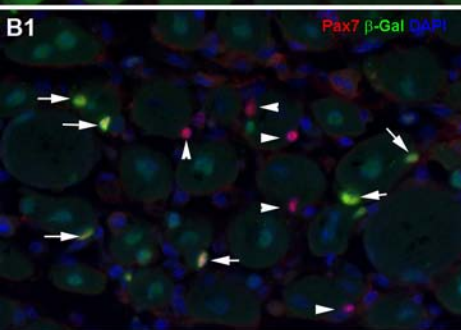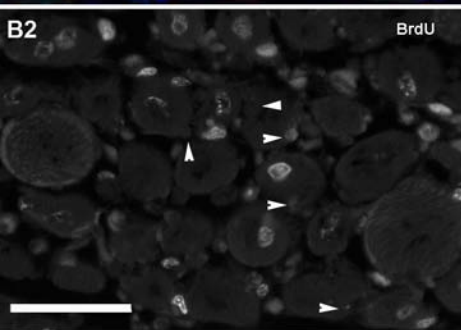

Figure S3

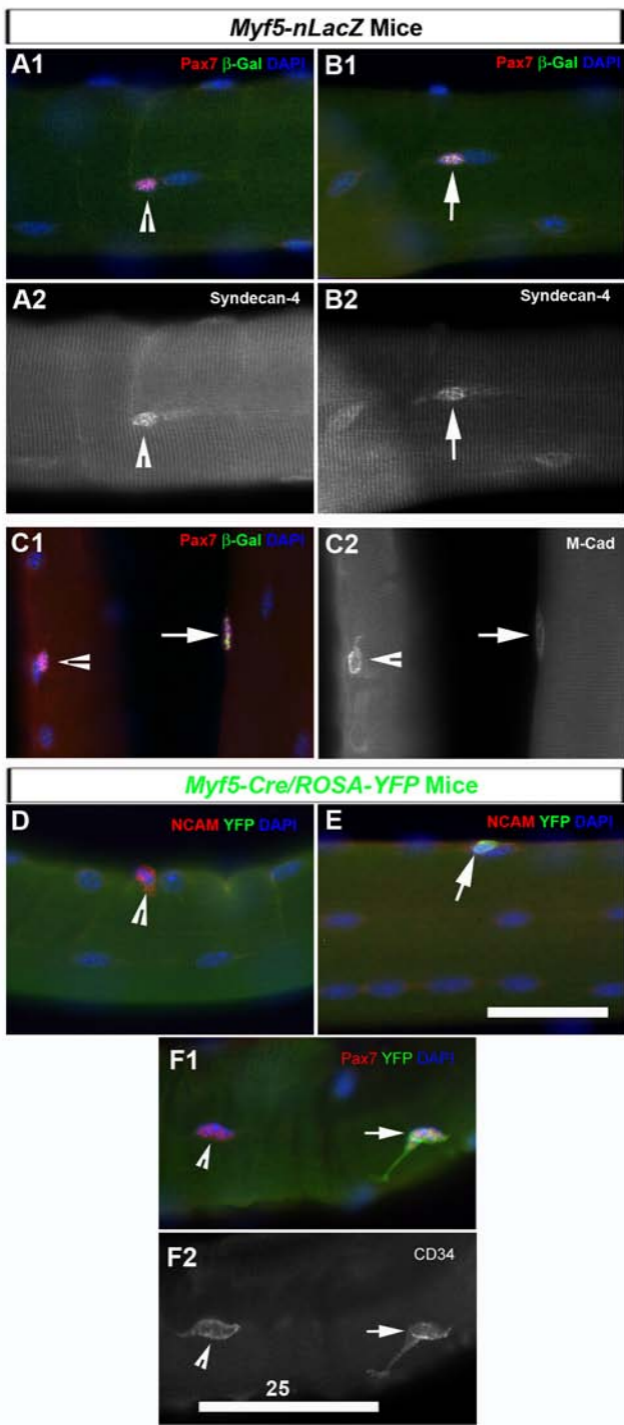

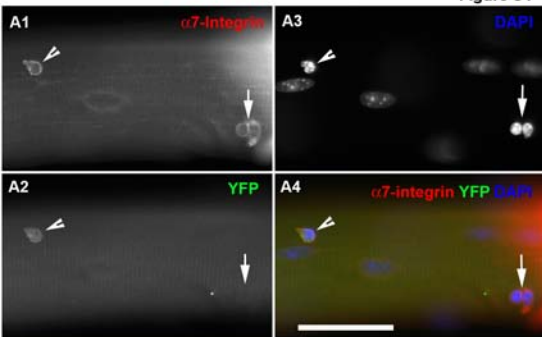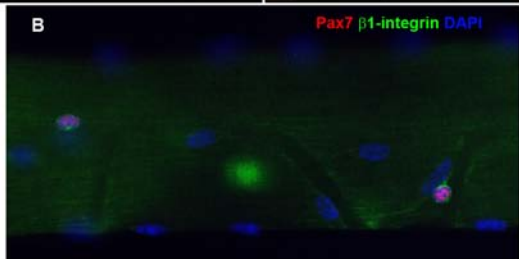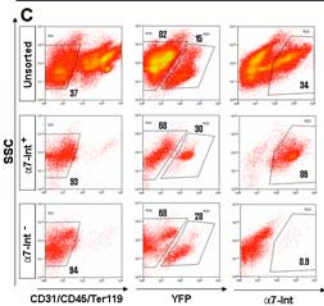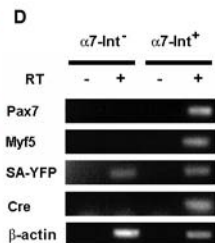

Figure S5

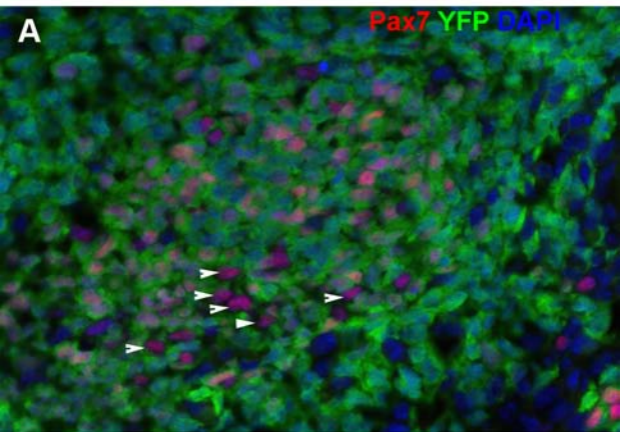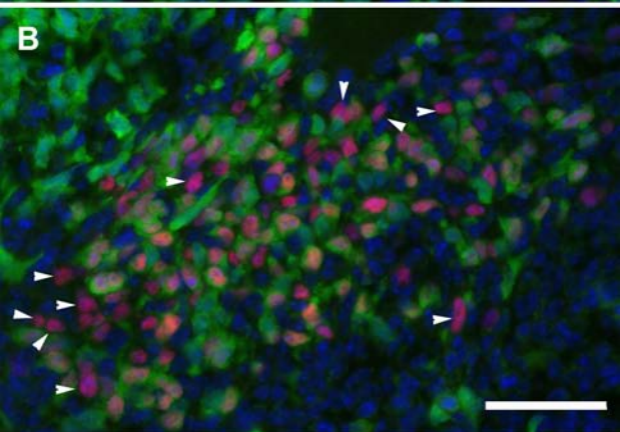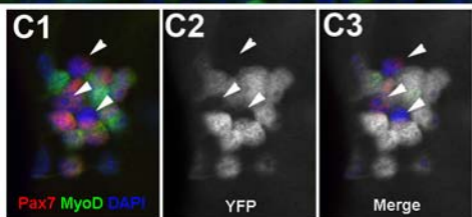

Figure S6

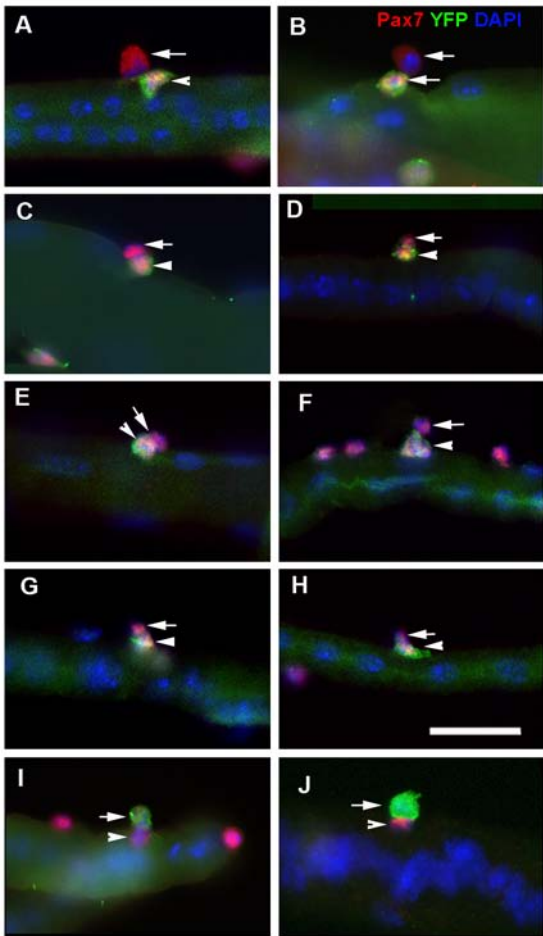

Figure S7

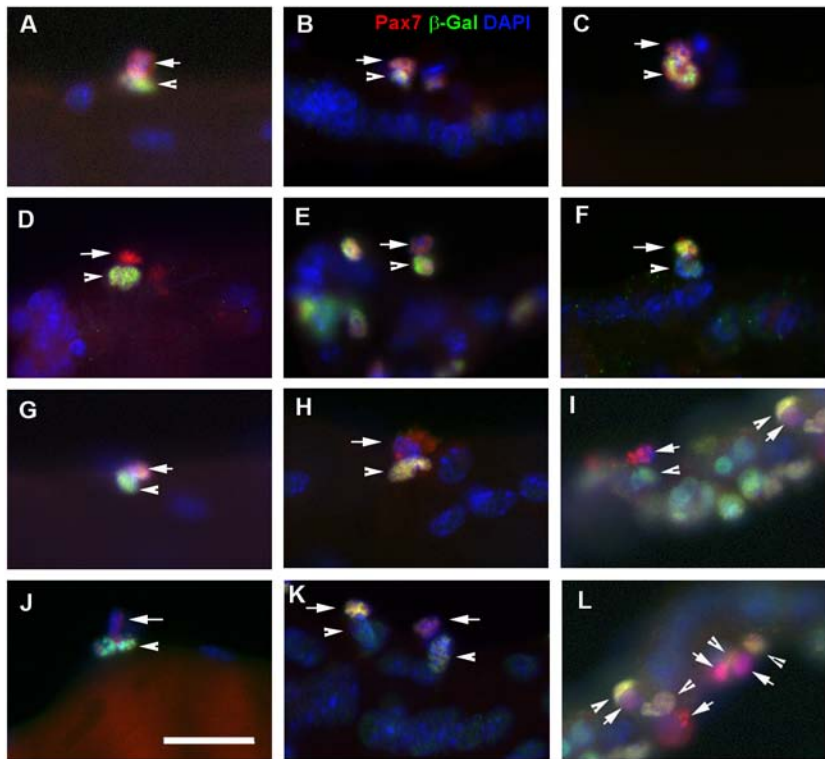

Figure S8

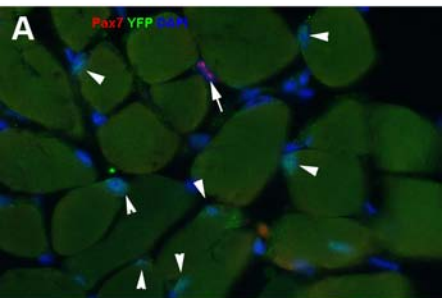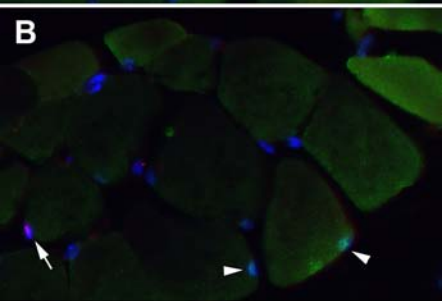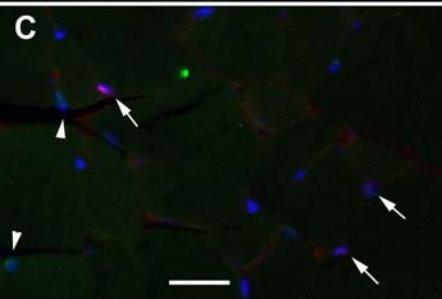

Supplement: NIHMS125932-supplement-Supplementary_Figures.pdf [file NIHMS125932-supplement-Supplementary_Figures.pdf]
